# Supplementary material for: Contrasting functions of ATP hydrolysis by MDA5 and LGP2 in viral RNA sensing
Source: PubMed Central journal article supplement (PMC10909783; doi:10.1016/j.jbc.2024.105711), 2024-02-01
Supplement: mmc2.pdf [file mmc2.pdf]

## **SUPPORTING INFORMATION for**

### **Contrasting functions of ATP hydrolysis by MDA5 and LGP2 in viral RNA sensing**

Rahul Singh, Yuan Wu, Alba Herrero del Valle, Kendra E. Leigh, Sai Mong, Mark T. K. Cheng, Brian J. Ferguson, Yorgo Modis

#### **This PDF files includes:**

Figure S1

Figure S2

Figure S3

Figure S4

#### **Other Supporting Information for this manuscript:**

Source data file for Figures 1-4, Figure 6, and Figures S1-S4.

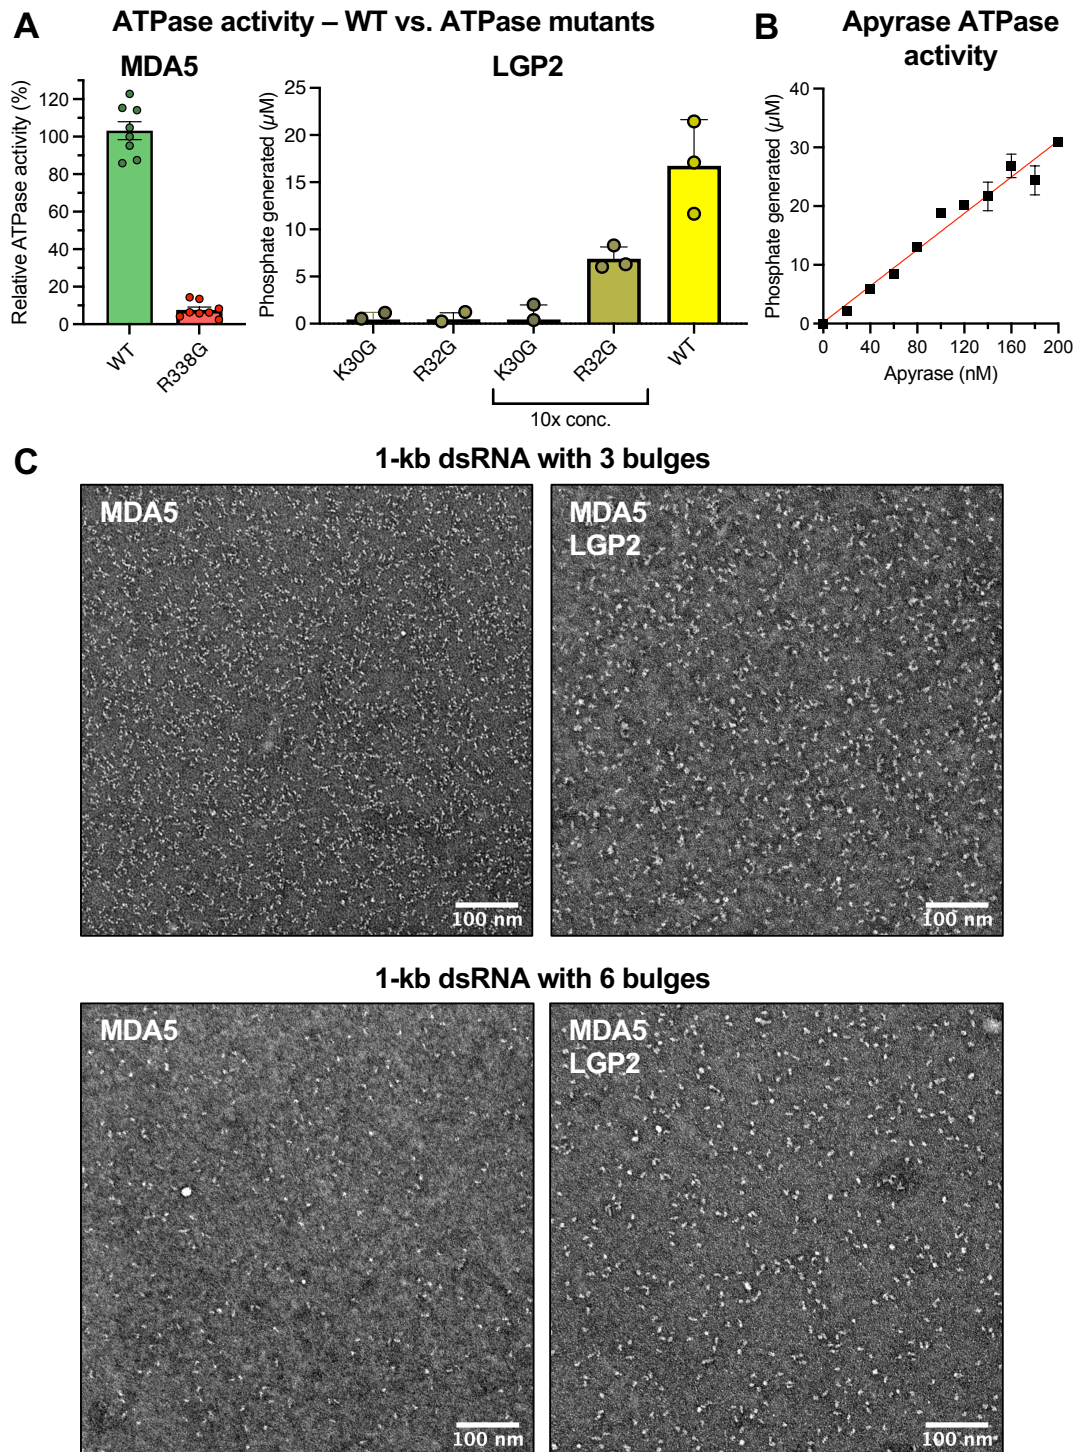

**Figure S1.** ATPase assays of MDA5 and LGP2 and electron micrographs with dsRNA containing bulges. **(A)** ATPase activities of R338G MDA5 (left), and K30G LGP2 and R32G LGP2 (right), in the presence of 1-kb dsRNA. Error bars show the s.e.m. of eight and three independent experiments for MDA5 and LGP2, respectively. **(B)** ATPase activity of apyrase, a monomeric ATPase, as a function of apyrase concentration. **(C)** Negative stain electron micrographs of filaments formed in the presence of 73 nM MDA5, 73 nM LGP2, 1 mM ATP-MgCl<sub>2</sub>, and 4.4 nM 1-kb dsRNA with 3 or 6 single-nucleotide bulges. Scale bars, 100 nm.

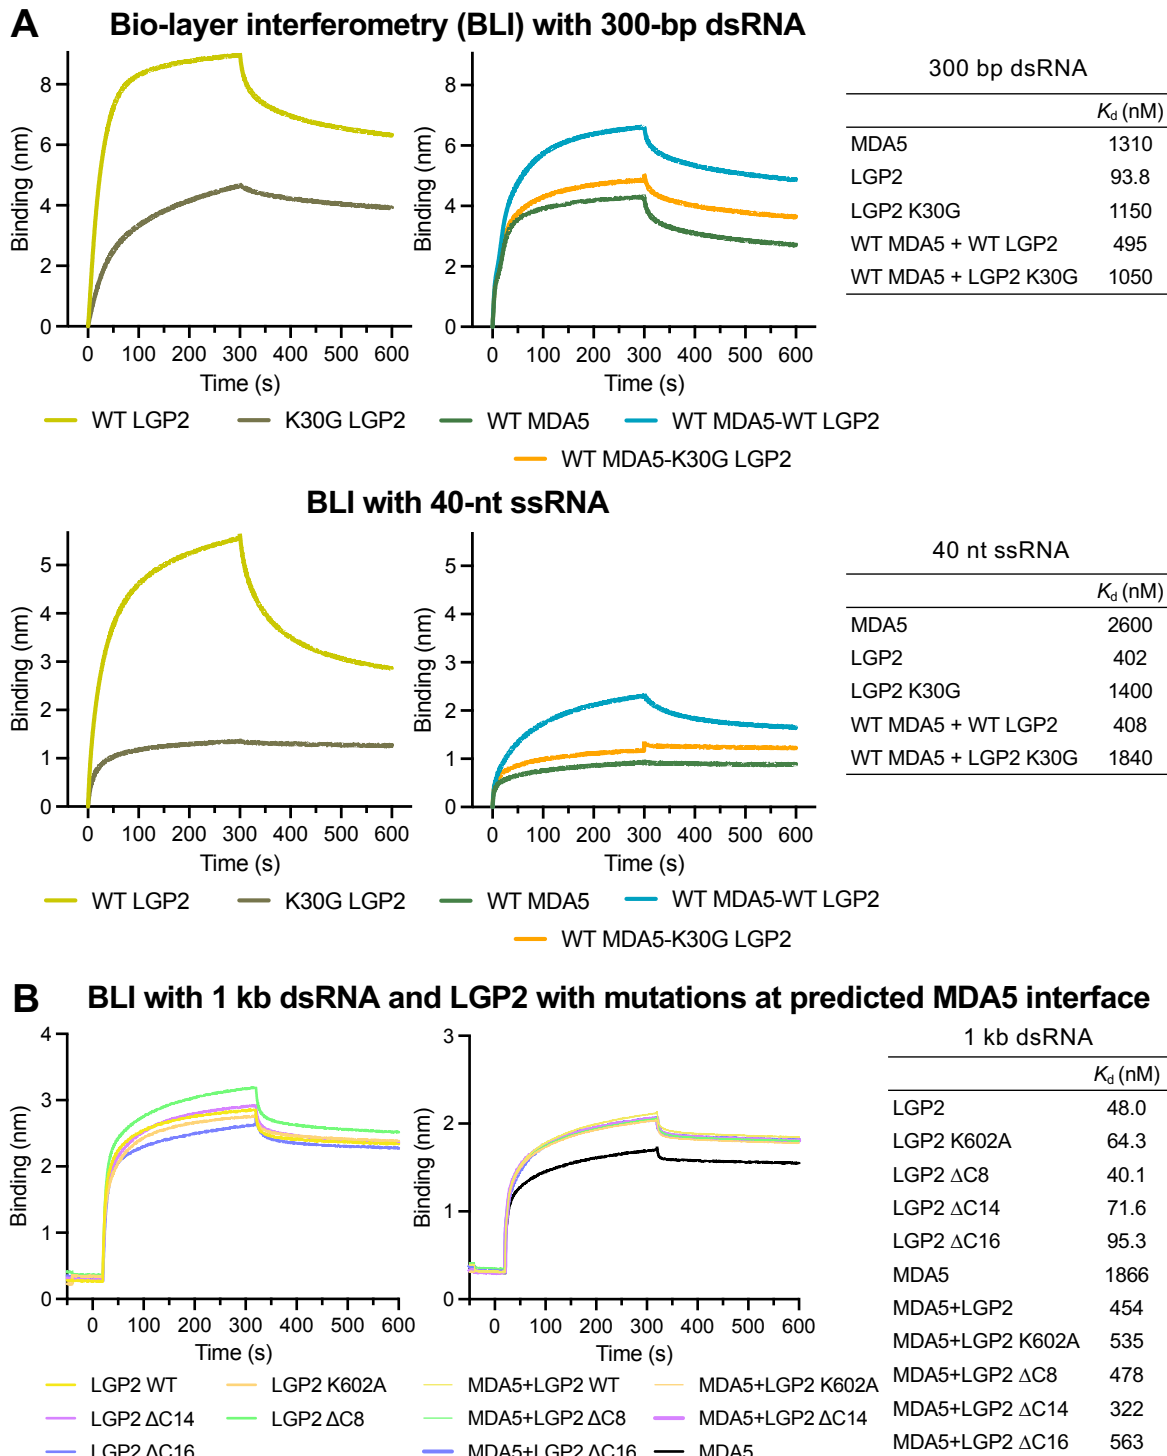

**Figure S2.** RNA binding assays with MDA5 and different LGP2 variants and RNA ligands. **(A)** Bio-layer interferometry with 3'-biotinylated 300-bp dsRNA (top) or 40-nt ssRNA (bottom) immobilized on a streptavidin biosensor and MDA5, LGP2 or MDA5-LGP2 mixtures in the mobile phase. Dissociation constants derived from the curves are tabulated. **(B)** Bio-layer interferometry with 3'-biotinylated 1-kb dsRNA immobilized on a streptavidin biosensor and MDA5, LGP2 or MDA5-LGP2 mixtures in the mobile phase. Dissociation constants derived from the curves are tabulated.

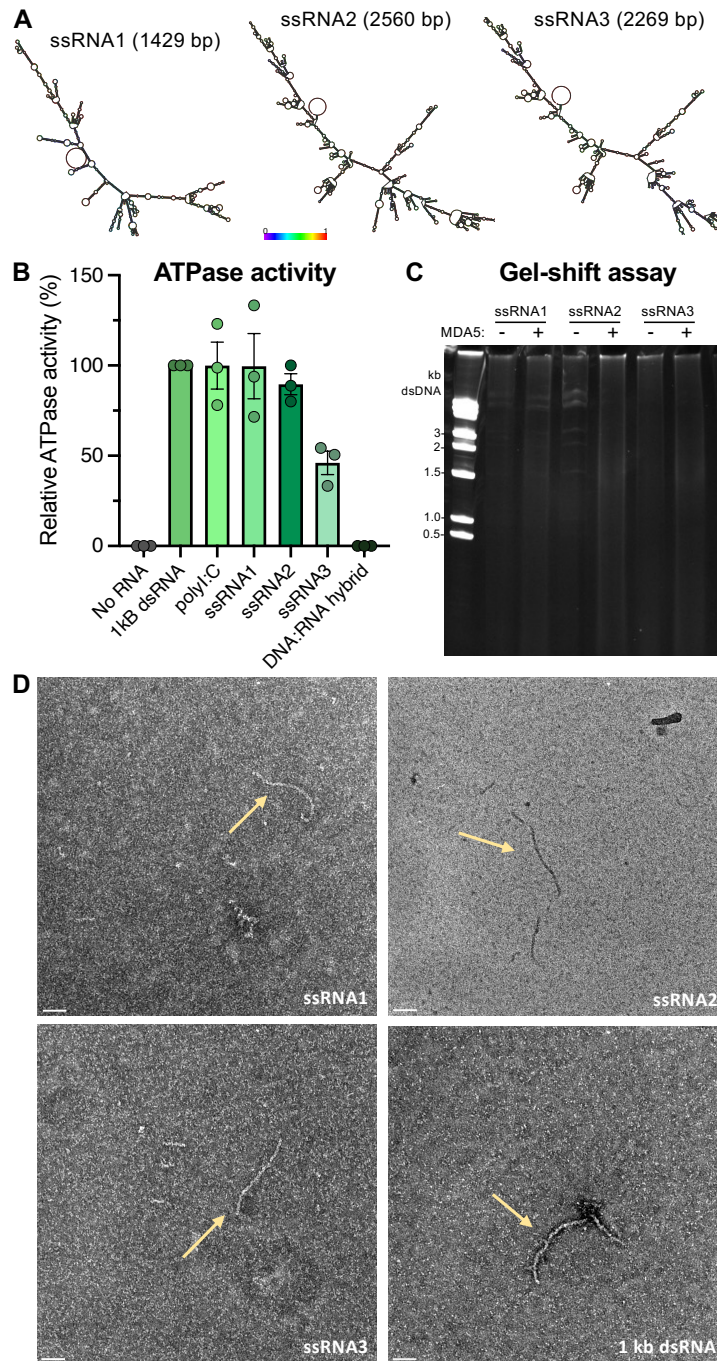

**Figure S3.** ATPase and RNA binding assays for MDA5 and long ssRNAs with complex secondary structure. **(A)** Synthetic ssRNAs designed to form complex, highly base-paired secondary structures. Minimum Free energy secondary structures predicted by RNAfold [<http://rna.tbi.univie.ac.at>] are shown, colored by base pairing probability. See source data file in Supporting Information for sequences. **(B)** MDA5 ATPase activity in the presence of ssRNA1-3, along with high-molecular weight poly(I:C) and a 1-kb DNA:RNA hybrid, expressed as percent of ATPase activity with 1-kb dsRNA. Error bars show the s.e.m. of three independent experiments. **(C)** Polyacrylamide gel-shift assay for binding of MDA5 to ssRNA1-3. **(D)** Negative-stain electron micrographs of MDA5 filaments formed in the presence of ssRNA1-3. Scale bars, 50 nm.

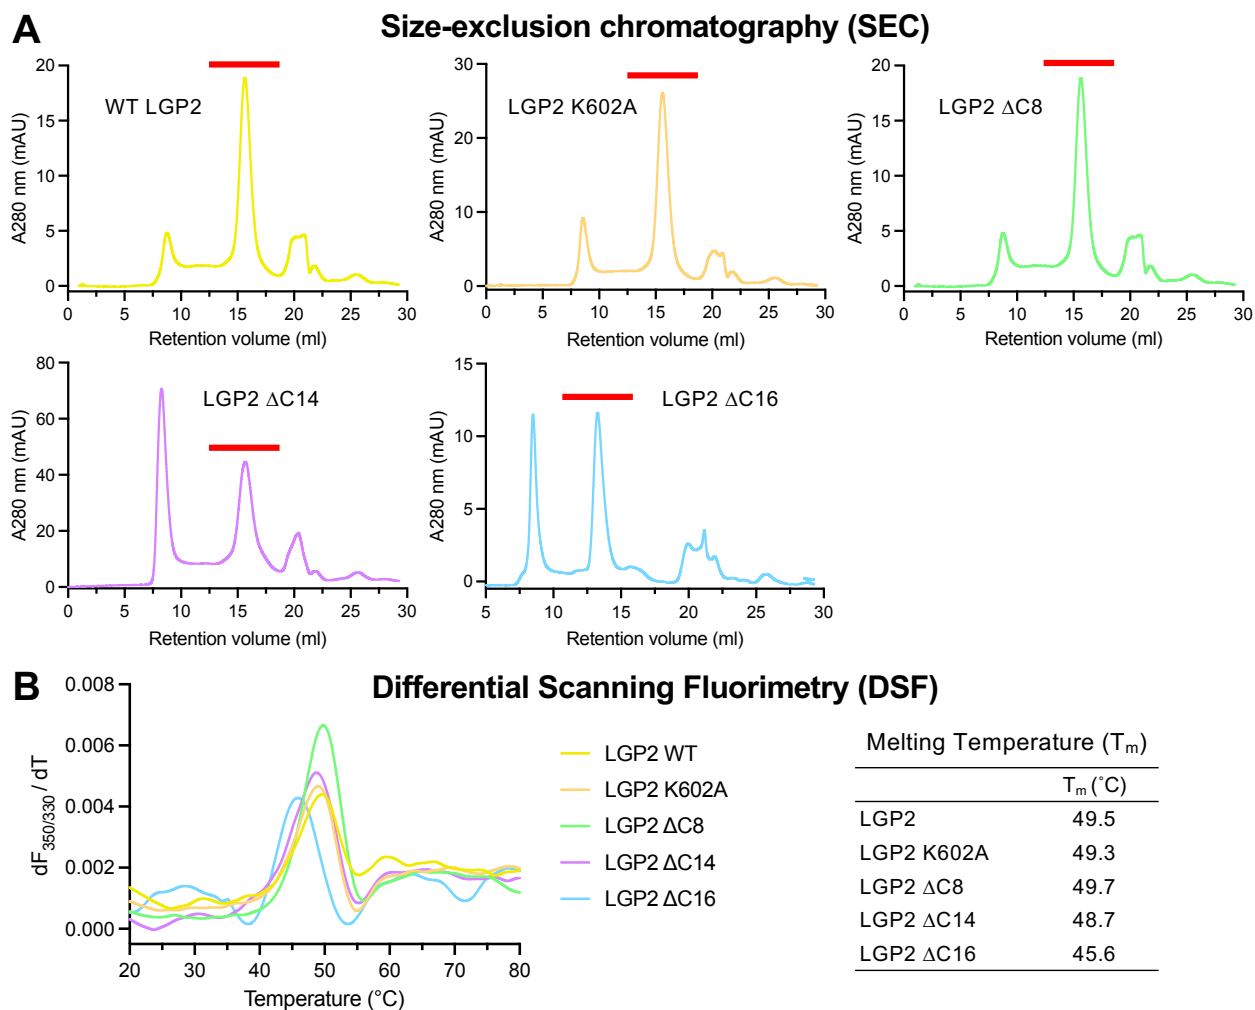

**Figure S4.** Size-exclusion chromatography (SEC) and differential scanning fluorimetry (DSF) of LGP2 C-terminal deletion and capping loop mutant. **(A)** SEC traces of wild-type, K602A,  $\Delta$ C8,  $\Delta$ C14, and  $\Delta$ C16 LGP2. Red lines indicate the elution volume ranges from which LGP2 fractions were collected for biochemical assays. **(B)** DSF of 25  $\mu$ M LGP2 (wild-type, K602A,  $\Delta$ C8,  $\Delta$ C14, or  $\Delta$ C16). Intrinsic protein fluorescence at 330 nm and 350 nm was measured and the fluorescence ratio plotted as a function of temperature. The temperature value at the peak of the first derivative of the fluorescence ratio versus temperature function was taken as the melting temperature ( $T_m$ ).
